# Supplementary material for: Hypermethylation of genomic 3.3-kb repeats is frequent event in HPV-positive cervical cancer
Source: PubMed Central journal article supplement (PMC2695481; doi:10.1186/1755-8794-2-30), 2009-05-27
Supplement: 1755-8794-2-30-S1.pdf [file 1755-8794-2-30-S1.pdf]

### Supplementary table

Hypermethylation of 3.3-kb repeats and hypomethylation of Sat2 repeats in cervical tumors

| №                    | sample | 3.3-kb repeats | Sat2 repeats |
|----------------------|--------|----------------|--------------|
| 1                    | 8      | hyper          | hypo         |
| 2                    | 12     | hyper          | hypo         |
| 3                    | 13     | hyper          | hypo         |
| 4                    | 14     | hyper          | hypo         |
| 5                    | 16     | hyper          | hypo         |
| 6                    | 19     |                |              |
| 7                    | 21     |                | hypo         |
| 8                    | 22     |                | hypo         |
| 9                    | 26     |                | hypo         |
| 10                   | 28     |                | hypo         |
| 11                   | 30     |                |              |
| 12                   | 31     |                |              |
| 13                   | 33     |                | hypo         |
| Frequency of changes |        | 5/13           | 10/13        |

Numbers of samples are indicated as in Figure 3.  
Hyper – hypermethylation, hypo – hypomethylation,  
empty box – the absence of changes.
